# Supplementary figures and images for: Plexin-A4 Mediates Cytotoxic T-cell Trafficking and Exclusion in Cancer
Source: Oxford University Press journal article supplement (doi:10.1158/2326-6066.cir-21-0061), 2021-11-23

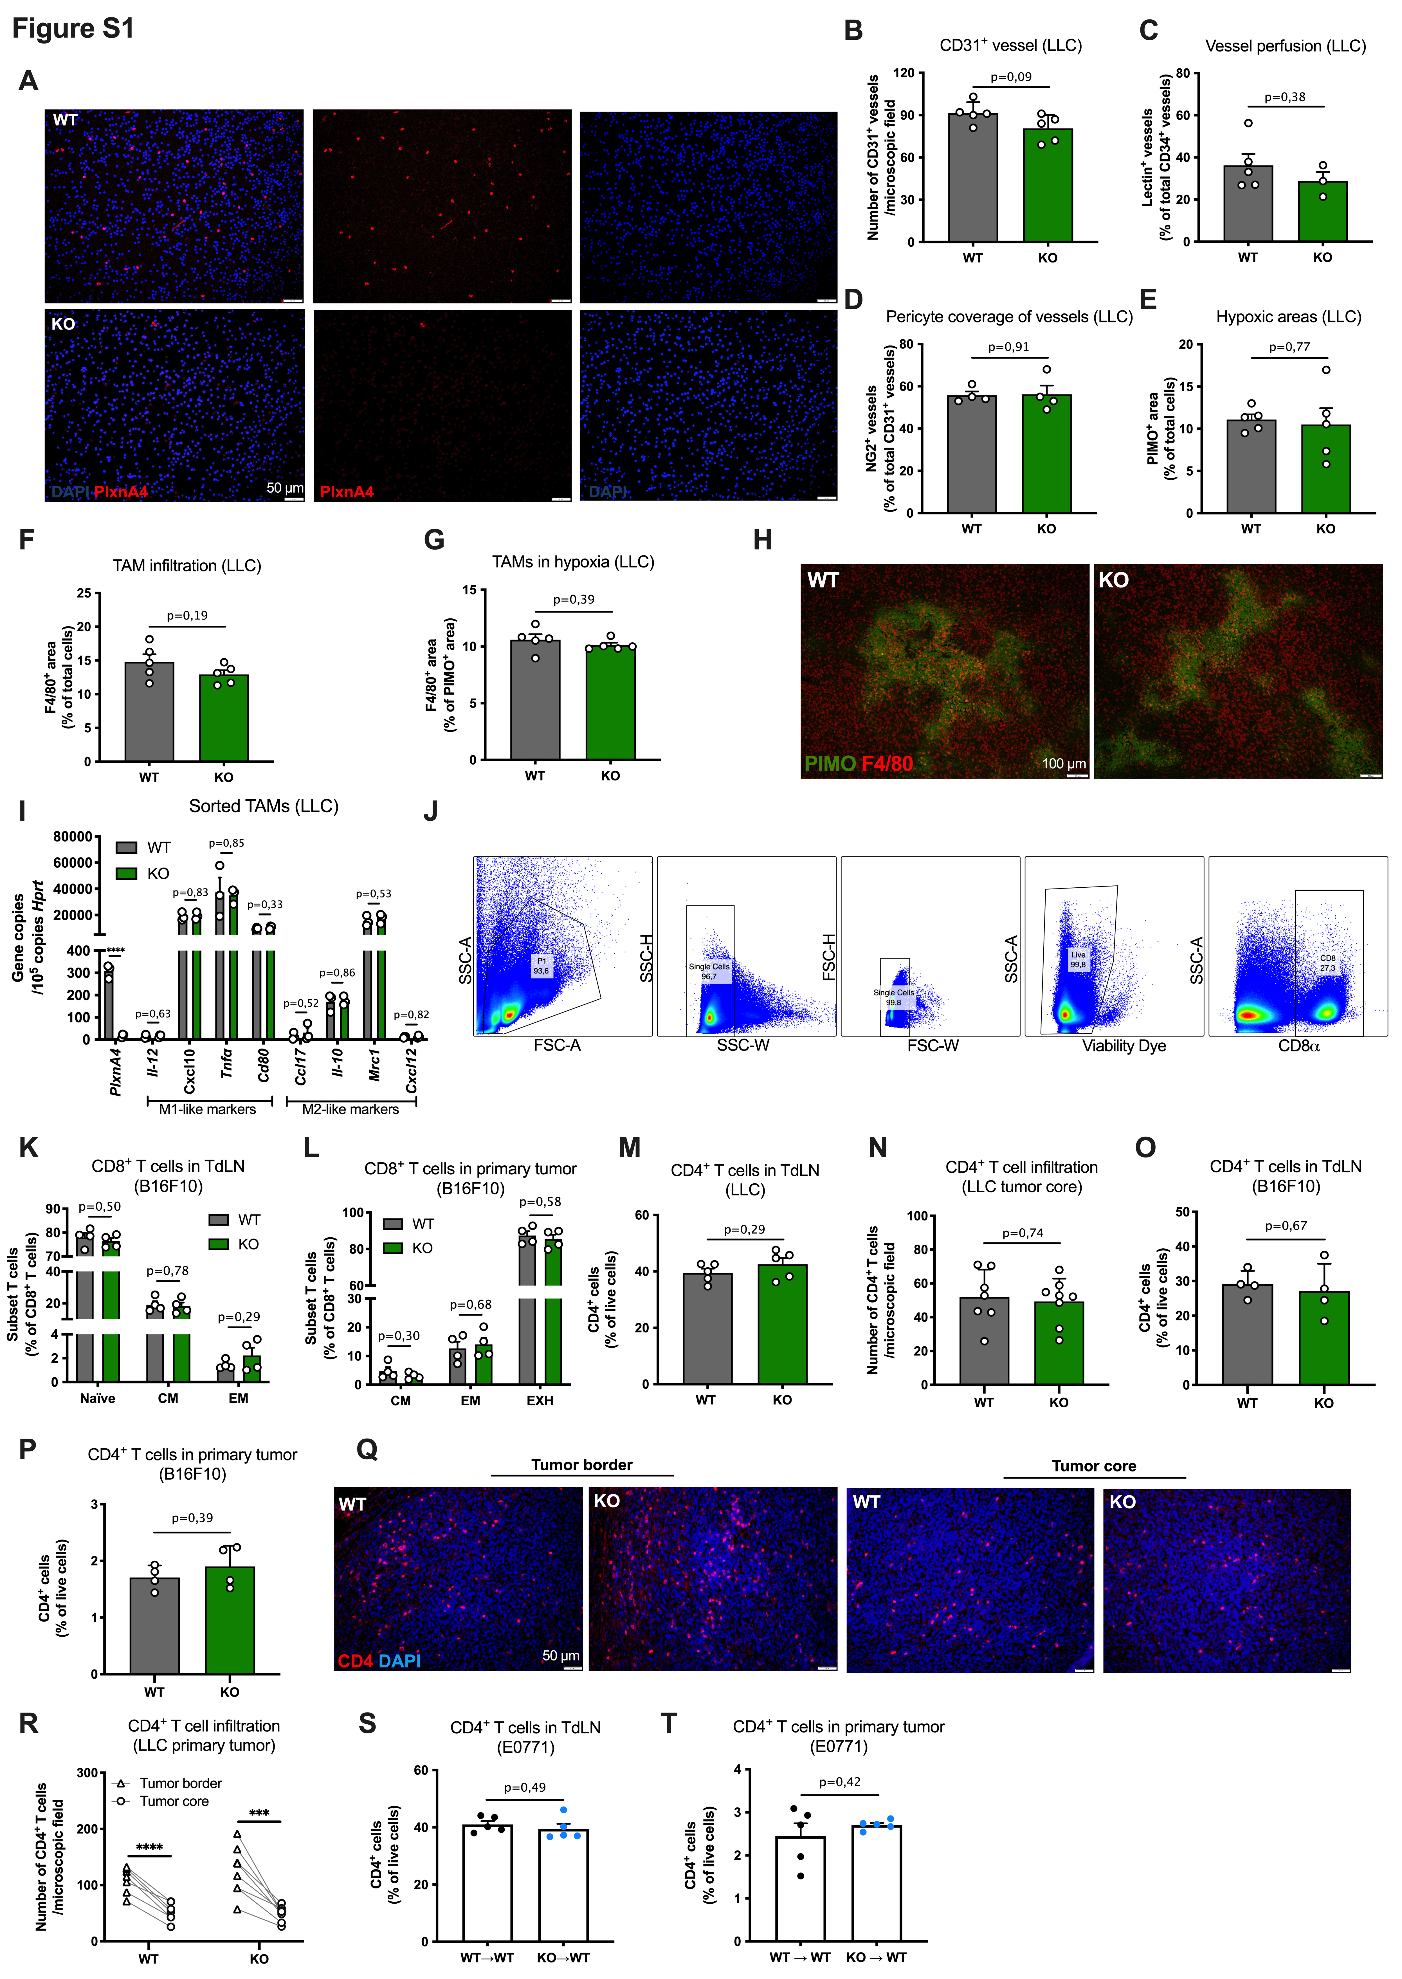

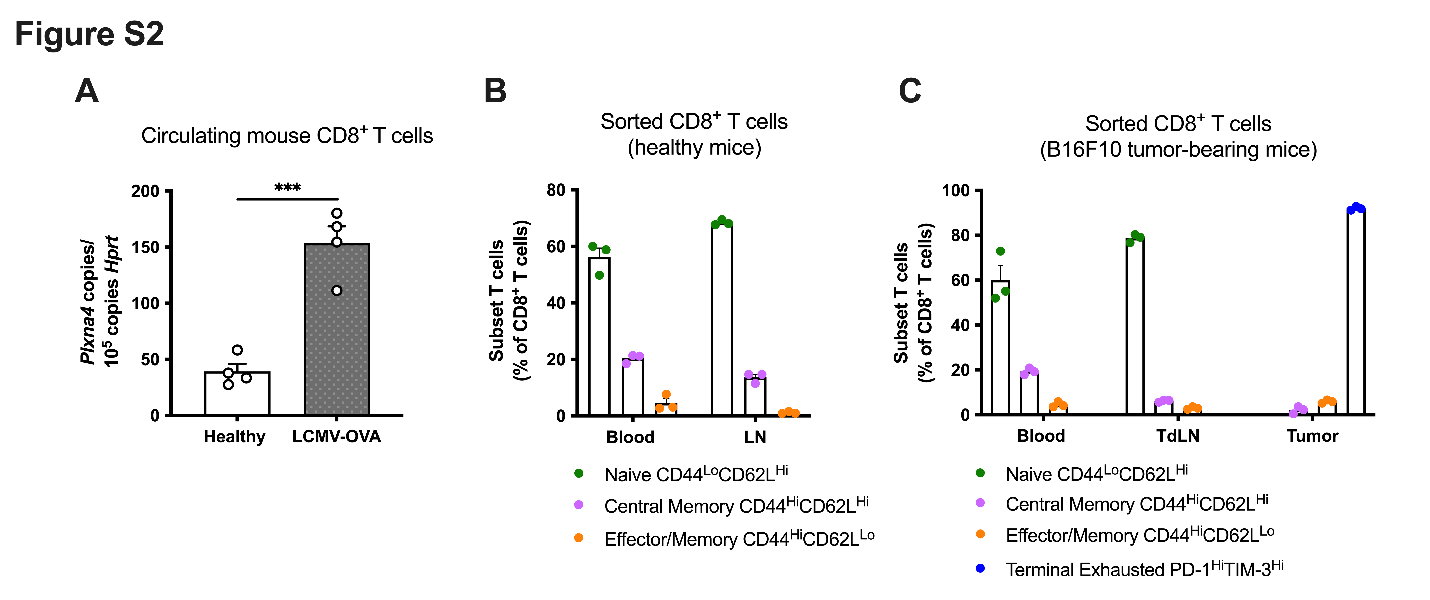


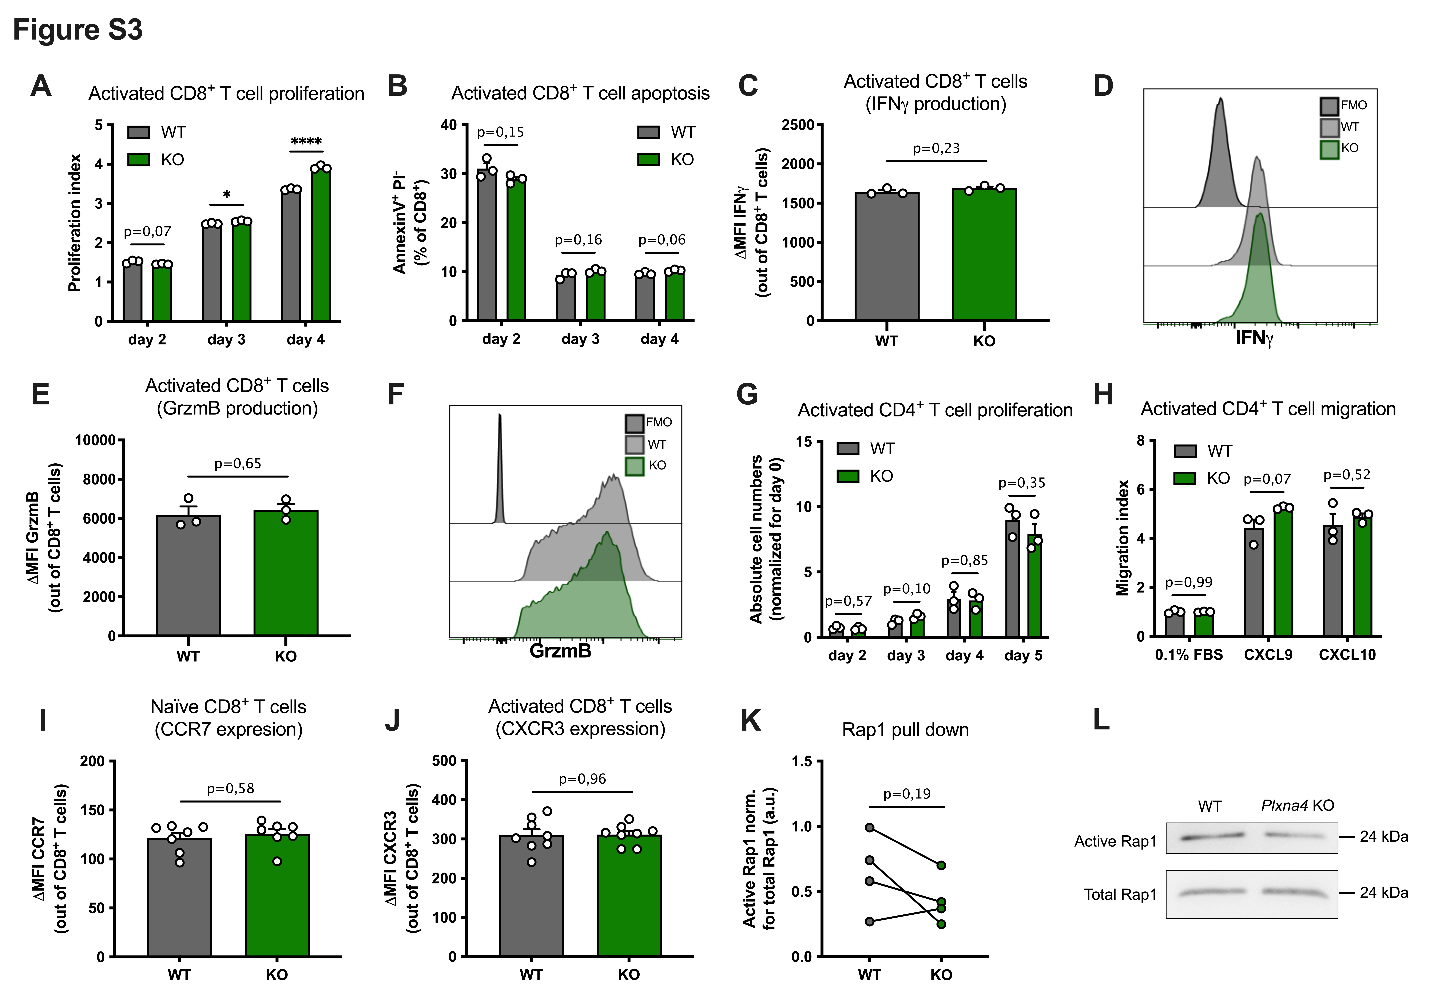

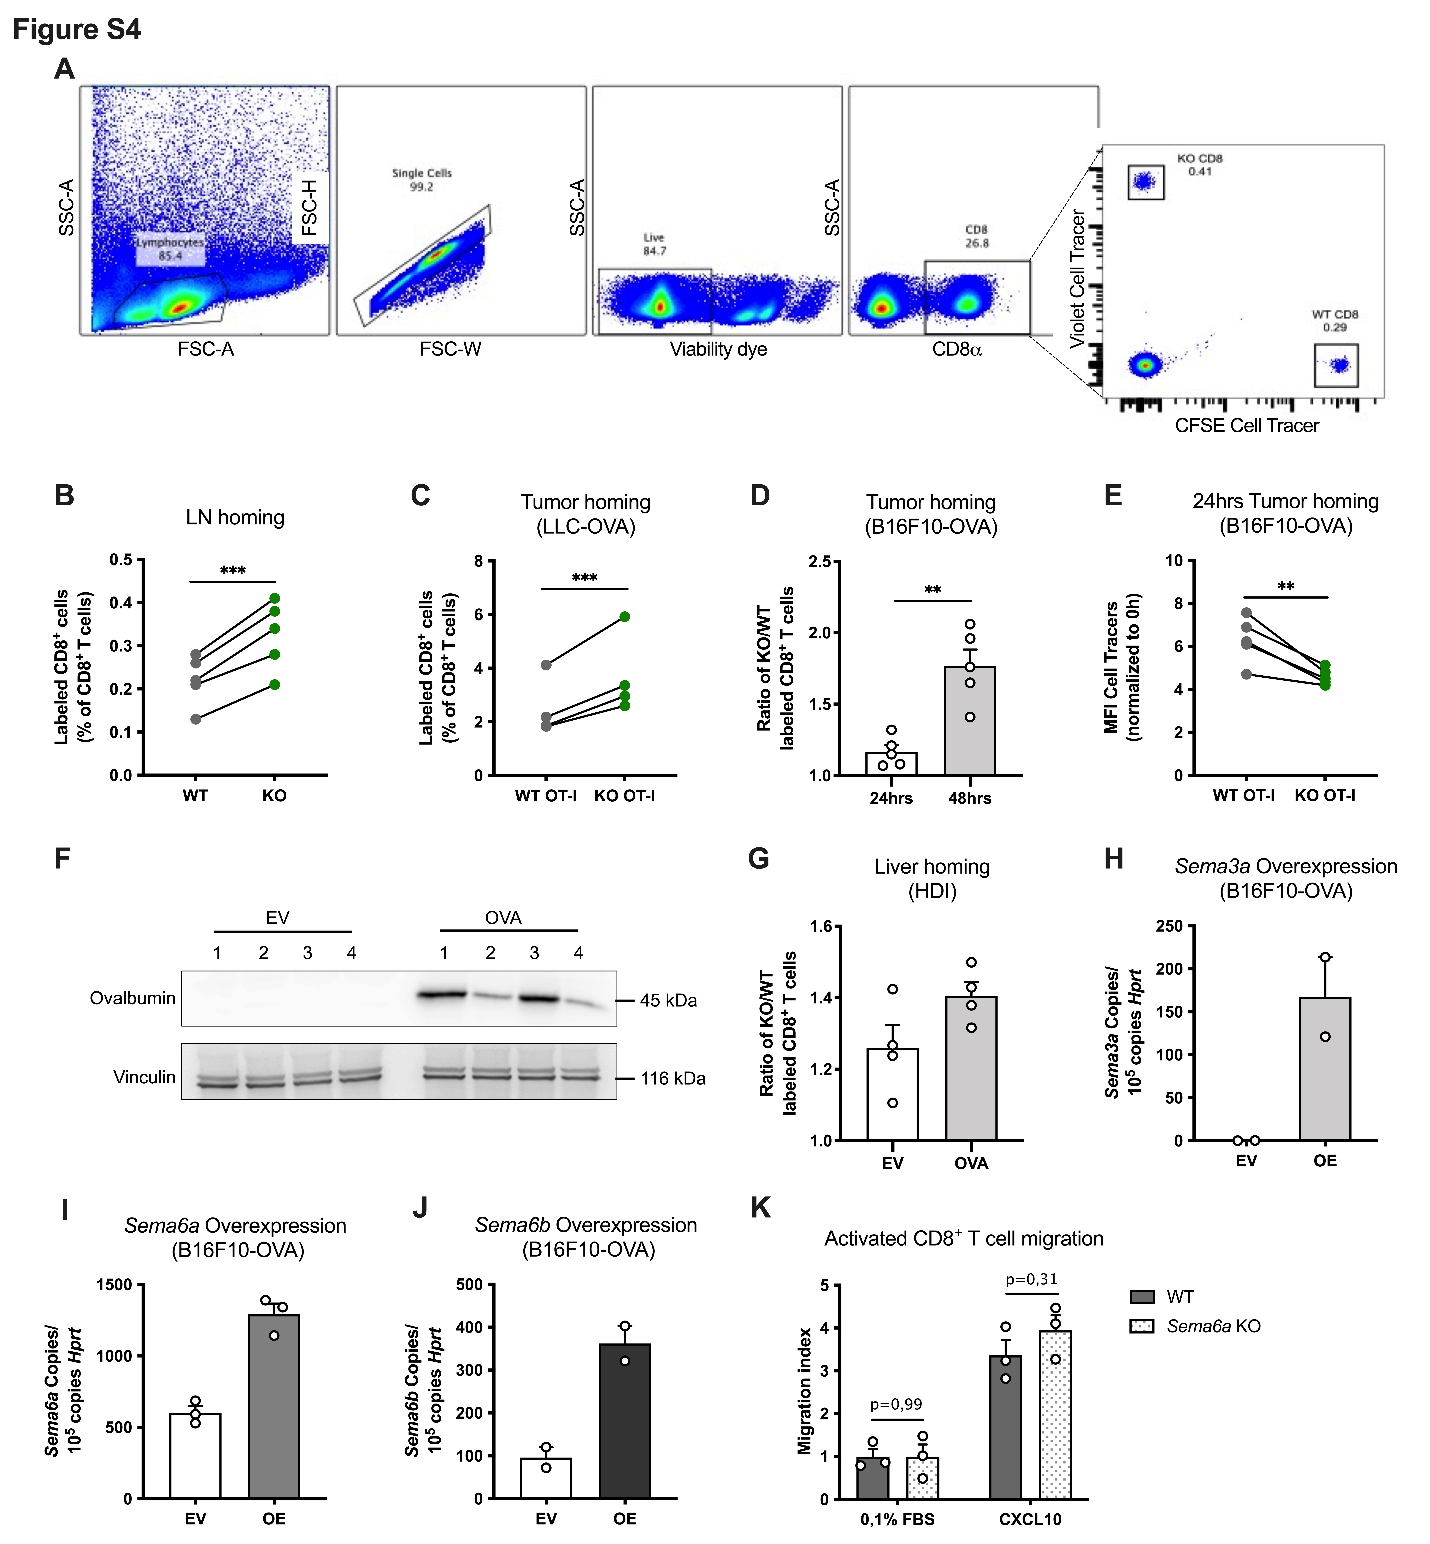

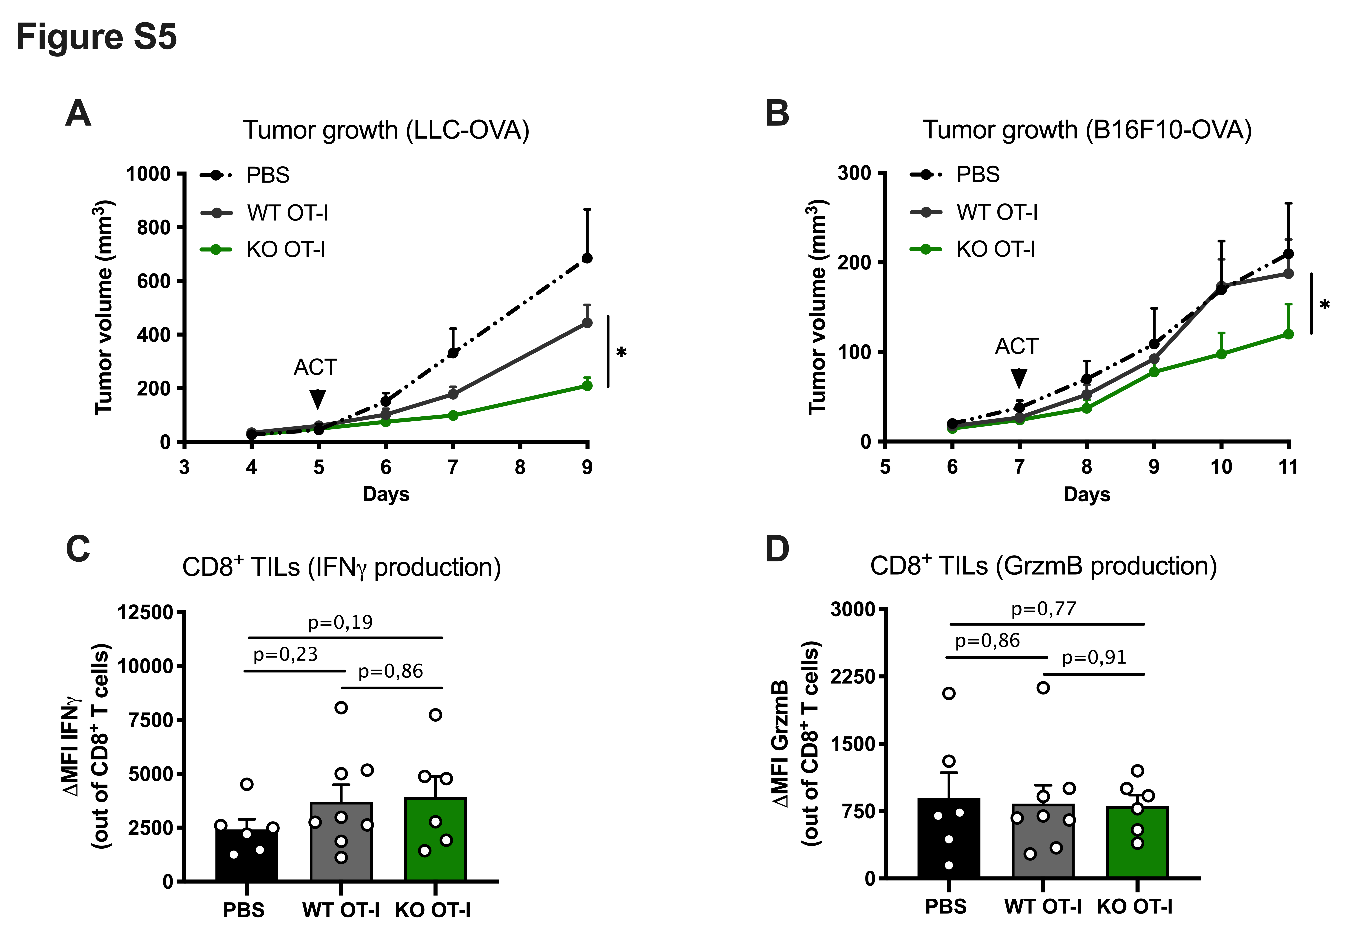


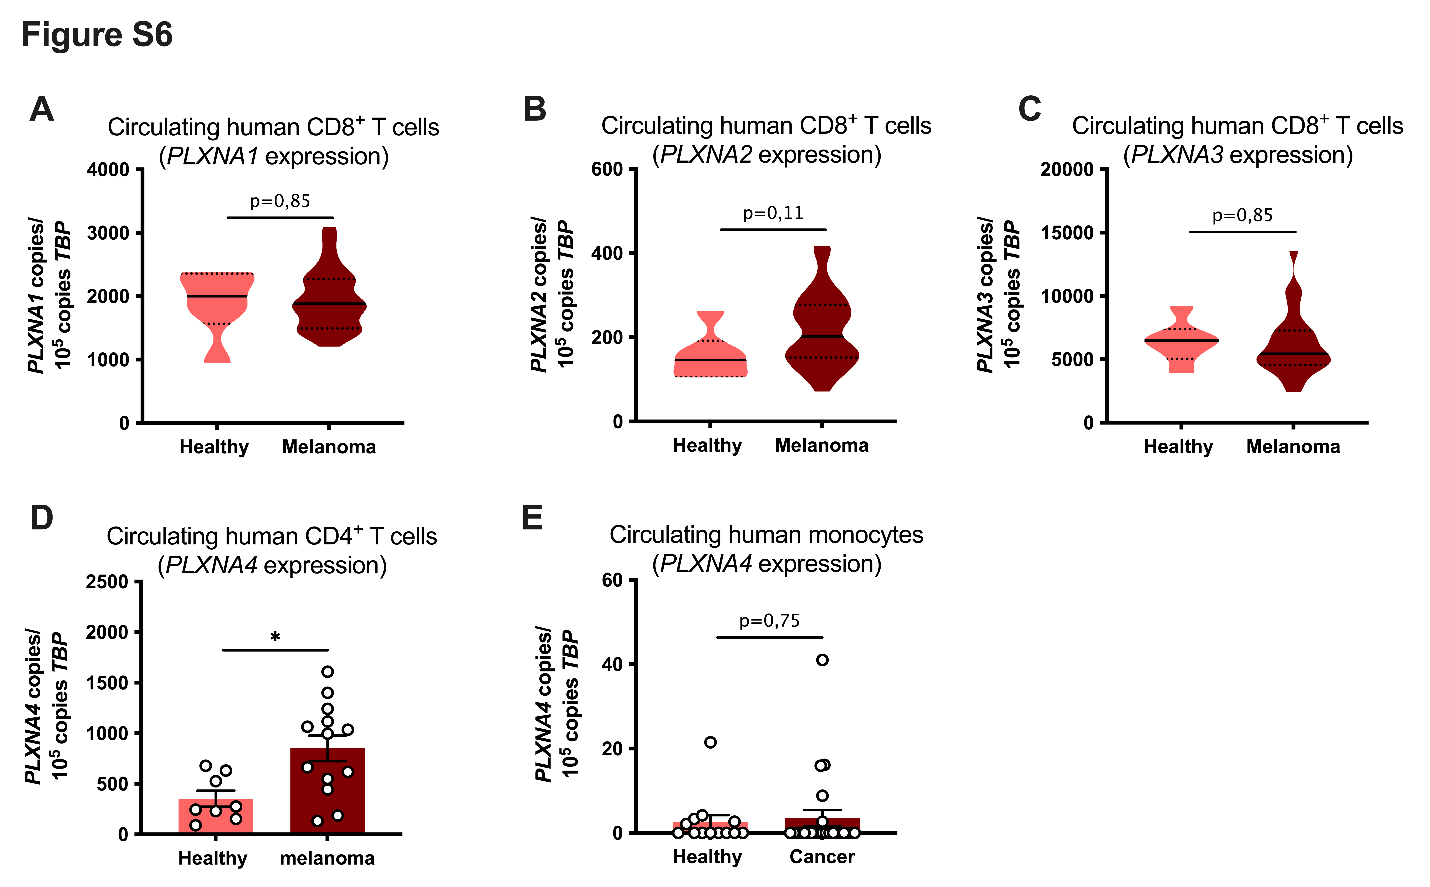

Supplement: cir-21-0061_suppfigs1-s6.docx [file cir-21-0061_suppfigs1-s6.docx]
